# Supplementary material for: Transition of wide-band gap semiconductor h-BN(BN)/P heterostructure via single-atom-embedding
Source: Royal Society of Chemistry journal article supplement (doi:10.1039/d0tc02371j), 2020-01-01
Supplement: d0tc02371j1.pdf [file d0tc02371j1.pdf]

## Supporting information

# Transition of wide-band gap semiconductor h-BN(BN)/P heterostructure via single-atom-embedding

Itsuki Miyazato\*

Department of Chemistry, Faculty of Science, Hokkaido University,  
Kita 10, Nishi 8, Kita-ku, Sapporo, 060-0810, Japan.

Tanveer Hussain

School of Molecular Sciences, The University of Western Australia, Perth, WA, 6009,  
Australia.

Keisuke Takahashi

Department of Chemistry, Faculty of Science, Hokkaido University,  
Kita 10, Nishi 8, Kita-ku, Sapporo, 060-0810, Japan.

\*miyazato@sci.hokudai.ac.jp

Table S-1 ~ Table S-6:

The Bader charge analysis result of single-atom-embedded h-BN/P heterostructures.

The shown columns are represented as:

-Element : the element atom in the calculated model.

-X, Y, Z : the coordinates of each element.

-Charge : the charge according to Bader partitioning.

Table S- 1. The result of Bader charge analysis on Na doped h-BN/P (Structure A) with GLLB-sc functional

| #  | Element | X         | Y         | Z         | CHARGE    |
|----|---------|-----------|-----------|-----------|-----------|
| 1  | N       | -0.007534 | 18.465689 | 31.006129 | 9.305083  |
| 2  | N       | -0.004012 | 4.313565  | 31.662452 | 9.320535  |
| 3  | N       | -0.006007 | 9.039698  | 31.663848 | 9.317095  |
| 4  | N       | -0.008064 | 13.735359 | 31.010852 | 9.304195  |
| 5  | N       | 4.237982  | 1.963492  | 31.346643 | 9.314776  |
| 6  | N       | 4.244328  | 6.675578  | 31.741789 | 9.319898  |
| 7  | N       | 4.23708   | 11.388179 | 31.345571 | 9.309171  |
| 8  | N       | 4.232876  | 16.100958 | 30.963911 | 9.307235  |
| 9  | B       | 2.802759  | 18.456003 | 31.060277 | 2.7007    |
| 10 | B       | 2.816872  | 4.303652  | 31.616373 | 2.709531  |
| 11 | B       | 2.813844  | 9.04927   | 31.613172 | 2.710697  |
| 12 | B       | 2.803046  | 13.7442   | 31.059319 | 2.698764  |
| 13 | B       | 7.049126  | 1.946487  | 31.346007 | 2.709061  |
| 14 | B       | 7.054733  | 6.67905   | 31.818696 | 2.718441  |
| 15 | B       | 7.046837  | 11.403789 | 31.338568 | 2.710931  |
| 16 | B       | 7.042621  | 16.099686 | 30.947481 | 2.695801  |
| 17 | P       | 0.90375   | 3.478656  | 22.698041 | 15.180794 |
| 18 | P       | 0.903012  | 9.731147  | 22.777721 | 15.22195  |
| 19 | P       | 0.93143   | 16.053466 | 22.938388 | 15.102935 |
| 20 | P       | 5.14358   | 0.323584  | 18.696332 | 15.025616 |
| 21 | P       | 5.175115  | 6.628568  | 18.352439 | 15.045832 |
| 22 | P       | 5.14143   | 12.894467 | 18.760952 | 15.025913 |
| 23 | P       | 3.770989  | 0.375651  | 22.880304 | 15.073784 |
| 24 | P       | 3.711137  | 6.602213  | 22.64853  | 15.339234 |
| 25 | P       | 3.756026  | 12.867176 | 22.934755 | 15.069253 |
| 26 | P       | 7.986851  | 3.461525  | 18.453686 | 15.00916  |
| 27 | P       | 7.995418  | 9.772913  | 18.537592 | 15.051565 |
| 28 | P       | 7.971836  | 16.031788 | 18.80426  | 14.990926 |
| 29 | Na      | 7.14899   | 6.4336    | 26.619657 | 10.140012 |

Table S- 2. The result of Bader charge analysis on Pt doped h-BN/P (Structure A) with GLLB-sc functional

| #  | Element | X         | Y         | Z         | CHARGE    |
|----|---------|-----------|-----------|-----------|-----------|
| 1  | N       | -0.001488 | 18.847112 | 30.578916 | 9.446354  |
| 2  | N       | 0.000255  | 4.72006   | 30.900133 | 9.372806  |
| 3  | N       | -0.002882 | 9.441123  | 31.255525 | 9.448787  |
| 4  | N       | -0.001293 | 14.134968 | 30.725827 | 9.451143  |
| 5  | N       | 4.237593  | 2.351642  | 30.864301 | 9.446348  |
| 6  | N       | 4.229154  | 7.070852  | 31.276888 | 9.450837  |
| 7  | N       | 4.237684  | 11.782212 | 30.939292 | 9.448711  |
| 8  | N       | 4.239964  | 16.490984 | 30.559401 | 9.448438  |
| 9  | B       | 2.807595  | 18.844607 | 30.640523 | 2.750389  |
| 10 | B       | 2.835173  | 4.715224  | 31.018223 | 2.747396  |
| 11 | B       | 2.80477   | 9.439522  | 31.19206  | 2.742146  |
| 12 | B       | 2.808254  | 14.134813 | 30.721473 | 2.745973  |
| 13 | B       | 7.038093  | 2.333628  | 30.736173 | 2.746111  |
| 14 | B       | 7.034323  | 7.099303  | 31.122261 | 2.749873  |
| 15 | B       | 7.052116  | 11.789404 | 30.971934 | 2.744229  |
| 16 | B       | 7.051498  | 16.486461 | 30.582542 | 2.747208  |
| 17 | P       | 2.092322  | 2.953354  | 23.49538  | 15.06446  |
| 18 | P       | 2.101023  | 9.179153  | 23.657043 | 15.169185 |
| 19 | P       | 2.07087   | 15.466901 | 23.527788 | 15.319513 |
| 20 | P       | 6.305768  | -0.264333 | 19.436671 | 15.237093 |
| 21 | P       | 6.378123  | 6.083433  | 19.264268 | 15.257599 |
| 22 | P       | 6.337718  | 12.346603 | 19.427688 | 15.216821 |
| 23 | P       | 4.914105  | -0.253765 | 23.552295 | 15.243697 |
| 24 | P       | 4.885923  | 6.038295  | 23.346576 | 15.007062 |
| 25 | P       | 4.951513  | 12.363497 | 23.528882 | 15.276659 |
| 26 | P       | 9.134978  | 2.885069  | 19.380211 | 15.228046 |
| 27 | P       | 9.198582  | 9.233214  | 19.503467 | 15.263547 |
| 28 | P       | 9.179671  | 15.473667 | 19.4213   | 15.260517 |
| 29 | Pt      | 7.863011  | 5.116885  | 26.181545 | 79.877234 |

Table S- 3. The result of Bader charge analysis on Pd doped h-BN/P (Structure A) with GLLB-sc functional

| #  | Element | X         | Y         | Z         | CHARGE    |
|----|---------|-----------|-----------|-----------|-----------|
| 1  | N       | -0.35909  | 18.855656 | 30.311861 | 9.37442   |
| 2  | N       | -0.358971 | 4.704905  | 30.938032 | 9.355523  |
| 3  | N       | -0.358169 | 9.436825  | 30.985056 | 9.371542  |
| 4  | N       | -0.35883  | 14.125942 | 30.317782 | 9.375309  |
| 5  | N       | 3.88127   | 2.355351  | 30.639288 | 9.37767   |
| 6  | N       | 3.878995  | 7.069482  | 31.03886  | 9.37469   |
| 7  | N       | 3.883296  | 11.779263 | 30.638016 | 9.376065  |
| 8  | N       | 3.88169   | 16.490646 | 30.252002 | 9.375783  |
| 9  | B       | 2.452386  | 18.85035  | 30.370688 | 2.729638  |
| 10 | B       | 2.461101  | 4.705456  | 30.904771 | 2.727289  |
| 11 | B       | 2.455507  | 9.43709   | 30.921183 | 2.725471  |
| 12 | B       | 2.452413  | 14.12964  | 30.371255 | 2.730011  |
| 13 | B       | 6.692365  | 2.345051  | 30.625482 | 2.726548  |
| 14 | B       | 6.688326  | 7.07495   | 31.02175  | 2.741123  |
| 15 | B       | 6.695521  | 11.785692 | 30.638708 | 2.724931  |
| 16 | B       | 6.694161  | 16.489377 | 30.254289 | 2.733026  |
| 17 | P       | 1.263468  | 3.328471  | 23.124457 | 15.023378 |
| 18 | P       | 1.272344  | 9.528542  | 23.07291  | 15.081413 |
| 19 | P       | 1.25587   | 15.834418 | 23.114025 | 15.156179 |
| 20 | P       | 5.474403  | 0.103055  | 18.992424 | 15.092816 |
| 21 | P       | 5.553965  | 6.409763  | 18.771619 | 15.121296 |
| 22 | P       | 5.499072  | 12.735659 | 18.929189 | 15.129222 |
| 23 | P       | 4.100454  | 0.120417  | 23.10749  | 15.180879 |
| 24 | P       | 4.052744  | 6.426989  | 22.863921 | 15.039328 |
| 25 | P       | 4.112787  | 12.715202 | 23.043524 | 15.127708 |
| 26 | P       | 8.324639  | 3.227452  | 18.996172 | 15.168388 |
| 27 | P       | 8.335692  | 9.591644  | 18.941246 | 15.15373  |
| 28 | P       | 8.356734  | 15.85543  | 18.99401  | 15.129625 |
| 29 | Pd      | 7.383454  | 6.511472  | 25.636466 | 46.716287 |

Table S- 4. The result of Bader charge analysis on Na doped h-BN/P (Structure B) with GLLB-sc functional

| #  | Element | X        | Y         | Z         | CHARGE    |
|----|---------|----------|-----------|-----------|-----------|
| 1  | N       | 7.426368 | 0.785679  | 31.422769 | 9.215731  |
| 2  | N       | 7.433729 | 5.496917  | 31.804398 | 9.229514  |
| 3  | N       | 7.426859 | 10.208346 | 31.433906 | 9.211732  |
| 4  | N       | 7.423547 | 14.921311 | 31.050304 | 9.207558  |
| 5  | N       | 3.185226 | 3.132251  | 31.748578 | 9.230472  |
| 6  | N       | 3.18545  | 7.862263  | 31.782068 | 9.22145   |
| 7  | N       | 3.182552 | 12.55664  | 31.120254 | 9.216857  |
| 8  | N       | 3.18231  | 17.28502  | 31.118073 | 9.216718  |
| 9  | B       | 1.756107 | 0.770895  | 31.42762  | 2.683925  |
| 10 | B       | 1.771677 | 5.496122  | 31.88421  | 2.691503  |
| 11 | B       | 1.75704  | 10.22351  | 31.44556  | 2.686305  |
| 12 | B       | 1.749304 | 14.92135  | 31.045142 | 2.673441  |
| 13 | B       | 5.998368 | 3.121064  | 31.697062 | 2.688319  |
| 14 | B       | 5.998501 | 7.873336  | 31.718057 | 2.691619  |
| 15 | B       | 5.992818 | 12.566963 | 31.15717  | 2.677139  |
| 16 | B       | 5.992403 | 17.275871 | 31.150997 | 2.677262  |
| 17 | P       | 2.6517   | 2.375639  | 22.781346 | 15.087563 |
| 18 | P       | 2.654361 | 8.634373  | 22.762037 | 15.040643 |
| 19 | P       | 2.682743 | 14.927098 | 22.928342 | 14.916197 |
| 20 | P       | 6.894503 | 18.075867 | 18.755194 | 14.832236 |
| 21 | P       | 6.918113 | 5.498899  | 18.412538 | 14.905937 |
| 22 | P       | 6.895567 | 11.7818   | 18.751296 | 14.891829 |
| 23 | P       | 5.511778 | 18.101402 | 22.928871 | 14.913358 |
| 24 | P       | 5.458706 | 5.503622  | 22.706082 | 15.180558 |
| 25 | P       | 5.512128 | 11.753412 | 22.92427  | 14.969174 |
| 26 | P       | 1.26011  | 2.35515   | 18.539619 | 14.90874  |
| 27 | P       | 1.257574 | 8.648488  | 18.523513 | 14.859396 |
| 28 | P       | 1.241581 | 14.928122 | 18.797739 | 14.881221 |
| 29 | Na      | 8.894125 | 5.544575  | 26.679945 | 10.042462 |

Table S- 5. The result of Bader charge analysis on Pt doped h-BN/P (Structure B) with GLLB-sc functional

| #  | Element | X        | Y         | Z         | CHARGE    |
|----|---------|----------|-----------|-----------|-----------|
| 1  | N       | 7.781783 | 0.775154  | 30.895897 | 9.419856  |
| 2  | N       | 7.790431 | 5.50024   | 30.941359 | 9.345062  |
| 3  | N       | 7.781014 | 10.224241 | 30.896848 | 9.411445  |
| 4  | N       | 7.777604 | 14.923913 | 30.520097 | 9.4195    |
| 5  | N       | 3.538901 | 3.130076  | 31.196427 | 9.42114   |
| 6  | N       | 3.538411 | 7.869164  | 31.192117 | 9.40865   |
| 7  | N       | 3.535793 | 12.562192 | 30.578096 | 9.418873  |
| 8  | N       | 3.535528 | 17.286385 | 30.578069 | 9.418871  |
| 9  | B       | 2.107549 | 0.775691  | 30.896763 | 2.725461  |
| 10 | B       | 2.138971 | 5.499369  | 31.134052 | 2.73195   |
| 11 | B       | 2.10743  | 10.224263 | 30.895488 | 2.72689   |
| 12 | B       | 2.103402 | 14.923885 | 30.519605 | 2.722197  |
| 13 | B       | 6.335745 | 3.112783  | 30.989598 | 2.730244  |
| 14 | B       | 6.336917 | 7.887568  | 30.989651 | 2.732387  |
| 15 | B       | 6.349378 | 12.571131 | 30.638274 | 2.724435  |
| 16 | B       | 6.349838 | 17.277327 | 30.636723 | 2.724536  |
| 17 | P       | 1.741412 | 2.499455  | 23.734868 | 15.030122 |
| 18 | P       | 1.735717 | 8.62845   | 23.7793   | 15.051088 |
| 19 | P       | 1.761707 | 14.972908 | 23.63444  | 15.232767 |
| 20 | P       | 6.000079 | 18.118109 | 19.529895 | 15.140811 |
| 21 | P       | 6.081624 | 5.569595  | 19.289411 | 15.171872 |
| 22 | P       | 6.011191 | 11.857301 | 19.502417 | 15.145542 |
| 23 | P       | 4.60396  | 18.100332 | 23.635455 | 15.19456  |
| 24 | P       | 4.548526 | 5.561528  | 23.357193 | 14.951256 |
| 25 | P       | 4.618748 | 11.861218 | 23.606485 | 15.195856 |
| 26 | P       | 0.36945  | 2.394275  | 19.590109 | 15.210165 |
| 27 | P       | 0.381918 | 8.732641  | 19.621699 | 15.209934 |
| 28 | P       | 0.377515 | 14.993458 | 19.528928 | 15.224761 |
| 29 | Pt      | 7.629383 | 5.379397  | 26.214487 | 79.522703 |

Table S- 6. The result of Bader charge analysis on Pd doped h-BN/P (Structure B) with GLLB-sc functional

| #  | Element | X        | Y         | Z         | CHARGE    |
|----|---------|----------|-----------|-----------|-----------|
| 1  | N       | 7.783355 | 0.777524  | 30.891135 | 9.441778  |
| 2  | N       | 7.787674 | 5.498454  | 30.912039 | 9.393005  |
| 3  | N       | 7.783549 | 10.220992 | 30.890205 | 9.438928  |
| 4  | N       | 7.782394 | 14.923138 | 30.558604 | 9.442975  |
| 5  | N       | 3.544847 | 3.13581   | 30.940983 | 9.446887  |
| 6  | N       | 3.543618 | 7.861204  | 30.943087 | 9.441821  |
| 7  | N       | 3.538784 | 12.564588 | 30.607423 | 9.44484   |
| 8  | N       | 3.538954 | 17.280739 | 30.607586 | 9.447767  |
| 9  | B       | 2.110224 | 0.776917  | 30.826304 | 2.73065   |
| 10 | B       | 2.133565 | 5.498318  | 30.934162 | 2.731664  |
| 11 | B       | 2.110064 | 10.220469 | 30.822939 | 2.72842   |
| 12 | B       | 2.106709 | 14.92306  | 30.567782 | 2.722093  |
| 13 | B       | 6.34557  | 3.121241  | 30.908302 | 2.730481  |
| 14 | B       | 6.344929 | 7.876554  | 30.910509 | 2.733838  |
| 15 | B       | 6.352035 | 12.570402 | 30.658539 | 2.731636  |
| 16 | B       | 6.351781 | 17.275735 | 30.660954 | 2.729999  |
| 17 | P       | 1.854751 | 2.496198  | 23.460216 | 15.159853 |
| 18 | P       | 1.855751 | 8.645204  | 23.462779 | 15.129738 |
| 19 | P       | 1.859358 | 14.992881 | 23.467943 | 15.198239 |
| 20 | P       | 6.090237 | 18.106766 | 19.322383 | 15.24027  |
| 21 | P       | 6.163943 | 5.572865  | 19.092186 | 15.21781  |
| 22 | P       | 6.090059 | 11.879346 | 19.322259 | 15.239372 |
| 23 | P       | 4.698249 | 18.130561 | 23.434748 | 15.256736 |
| 24 | P       | 4.661413 | 5.570563  | 23.169819 | 15.111626 |
| 25 | P       | 4.700281 | 11.857079 | 23.434863 | 15.253596 |
| 26 | P       | 0.450505 | 2.389966  | 19.333273 | 15.220878 |
| 27 | P       | 0.455418 | 8.751516  | 19.332952 | 15.196174 |
| 28 | P       | 0.468943 | 14.992826 | 19.353713 | 15.183001 |
| 29 | Pd      | 7.895911 | 5.570394  | 26.038685 | 46.982487 |
